# Supplementary material
Source: PubMed Central journal article supplement (PMC10787574)

## SUPPLEMENTARY MATERIALS

Supplementary Table 1: Characteristics of sampled rooms

| Home type   | Room type* | Mean (SD)              |                                |                                  |
|-------------|------------|------------------------|--------------------------------|----------------------------------|
|             |            | Sampling time<br>[min] | Room area<br>[m <sup>2</sup> ] | Distance<br>between rooms<br>[m] |
| Hookah      | Primary    |                        | 47.8 (18.2)                    | 6.6 (3.4)                        |
| Hookah      | Secondary  |                        | 35.8 (14.4)                    |                                  |
| E-cigarette | Primary    |                        | 54.7 (38.1)                    | 8.7 (5.0)                        |
| E-cigarette | Secondary  |                        | 29.7 (21.8)                    |                                  |
| Cigarette   | Primary    |                        | 40.7 (23.4)                    | 6.4 (2.8)                        |
| Cigarette   | Secondary  |                        | 32.6 (13.9)                    |                                  |
| Non-smoking |            |                        | 52.5 (21.5)                    |                                  |

\* Primary rooms were defined as rooms where e-cigarettes, cigarettes, or hookahs were being used and secondary rooms were rooms adjacent to where such products were being used

Abbreviations: SD = standard deviation

Supplemental Table 2. Post-ANOVA comparison of log-transformed data using Tukey Simultaneous Test, by pollutant and room type

| <b>Comparison<br/>(mean product 1 minus<br/>mean product 2)</b> | <b>Room<br/>Type<sup>§</sup></b> | <b>Pollutant</b>                          | <b>Difference<br/>of Means</b> | <b>95% CI</b> |
|-----------------------------------------------------------------|----------------------------------|-------------------------------------------|--------------------------------|---------------|
| Nonsmoking - cigarette                                          | Primary                          | PM <sub>2.5</sub><br>[µg/m <sup>3</sup> ] | -1.7                           | -2.5, -0.9*   |
| Nonsmoking - E-cigarette                                        |                                  |                                           | -1.0                           | -1.8, -0.2*   |
| Nonsmoking - hookah                                             |                                  |                                           | -1.3                           | -2.2, -0.4*   |
| Hookah - cigarette                                              |                                  |                                           | -0.4                           | -1.3, 0.5     |
| Hookah - E-cigarette                                            |                                  |                                           | 0.3                            | -0.6, 1.1     |
| E-cigarette - cigarette                                         |                                  |                                           | -0.6                           | -1.4, 0.2     |
| Nonsmoking - cigarette                                          | Primary                          | BC<br>[ng/m <sup>3</sup> ]                | -0.6                           | -1.2, 0       |
| Nonsmoking - E-cigarette                                        |                                  |                                           | -0.3                           | -0.9, 0.3     |
| Nonsmoking - hookah                                             |                                  |                                           | -0.6                           | -1.3, 0       |
| Hookah - cigarette                                              |                                  |                                           | 0.0                            | -0.6, 0.6     |
| Hookah - E-cigarette                                            |                                  |                                           | 0.3                            | -0.3, 0.9     |
| E-cigarette - cigarette                                         |                                  |                                           | -0.3                           | -0.9, 0.3     |
| Nonsmoking - cigarette                                          | Primary                          | CO<br>[ppm]                               | 0.1                            | -0.2, 0.5     |
| Nonsmoking - E-cigarette                                        |                                  |                                           | 0.0                            | -0.4, 0.4     |
| Nonsmoking - hookah                                             |                                  |                                           | -0.3                           | -0.7, 0       |
| Hookah - cigarette                                              |                                  |                                           | 0.5                            | 0.1, 0.9*     |
| Hookah - E-cigarette                                            |                                  |                                           | 0.3                            | -0.1, 0.8     |
| E-cigarette - cigarette                                         |                                  |                                           | 0.1                            | -0.3, 0.6     |
| Nonsmoking - cigarette                                          | Secondary                        | PM <sub>2.5</sub><br>[µg/m <sup>3</sup> ] | -1.2                           | -2, -0.5*     |
| Nonsmoking - E-cigarette                                        |                                  |                                           | -0.4                           | -1.1, 0.3     |
| Nonsmoking - hookah                                             |                                  |                                           | -0.8                           | -1.6, -0.1*   |
| Hookah - cigarette                                              |                                  |                                           | -0.4                           | -1.2, 0.5     |
| Hookah - E-cigarette                                            |                                  |                                           | 0.4                            | -0.4, 1.2     |
| E-cigarette - cigarette                                         |                                  |                                           | -0.8                           | -1.6, 0       |
| Nonsmoking - cigarette                                          | Secondary                        | BC<br>[ng/m <sup>3</sup> ]                | -0.4                           | -1, 0.2       |
| Nonsmoking - E-cigarette                                        |                                  |                                           | 0.0                            | -0.6, 0.6     |
| Nonsmoking - hookah                                             |                                  |                                           | -0.4                           | -1, 0.3       |
| Hookah - cigarette                                              |                                  |                                           | 0.0                            | -0.6, 0.6     |
| Hookah - E-cigarette                                            |                                  |                                           | 0.4                            | -0.2, 1       |
| E-cigarette - cigarette                                         |                                  |                                           | -0.4                           | -1, 0.2       |
| Nonsmoking - cigarette                                          | Secondary                        | CO<br>[ppm]                               | 0.1                            | -0.3, 0.5     |
| Nonsmoking - E-cigarette                                        |                                  |                                           | 0.4                            | 0, 0.9        |
| Nonsmoking - hookah                                             |                                  |                                           | -0.2                           | -0.6, 0.1     |
| Hookah - cigarette                                              |                                  |                                           | 0.3                            | 0.1, 0.8      |
| Hookah - E-cigarette                                            |                                  |                                           | 0.7                            | 0.2, 1.2*     |
| E-cigarette - cigarette                                         |                                  |                                           | -0.4                           | -0.9, 0.2     |

\*Significant at  $p \leq 0.05$

<sup>§</sup> Primary rooms were defined as rooms where e-cigarettes, cigarettes, or hookahs were being used and secondary rooms were defined as rooms adjacent to where such products were being used

Abbreviations: BC = black carbon; PM<sub>2.5</sub> = particulate matter with diameter less than 2.5 micrometers; CO = carbon monoxide; CI = confidence interval

Supplemental Figure 1. Mean particulate matter with diameter less than 2.5 micrometers (PM<sub>2.5</sub>) concentrations (columns) by product (cigarette, e-cigarette, hookah, non-smoking), room type (primary, secondary), and time period (pre-exposure (PRE), exposure (EXP), post-exposure (POST)). Blue bars above the columns represent one standard error from the mean. Primary rooms were defined as rooms where e-cigarettes, cigarettes, or hookahs were being used and secondary rooms were defined as rooms adjacent to where such products were being used. Non-smoking panels have only one bar, as air quality measurements were taken in only one room in the house and averaged for the entire time period, as there was no exposure period.

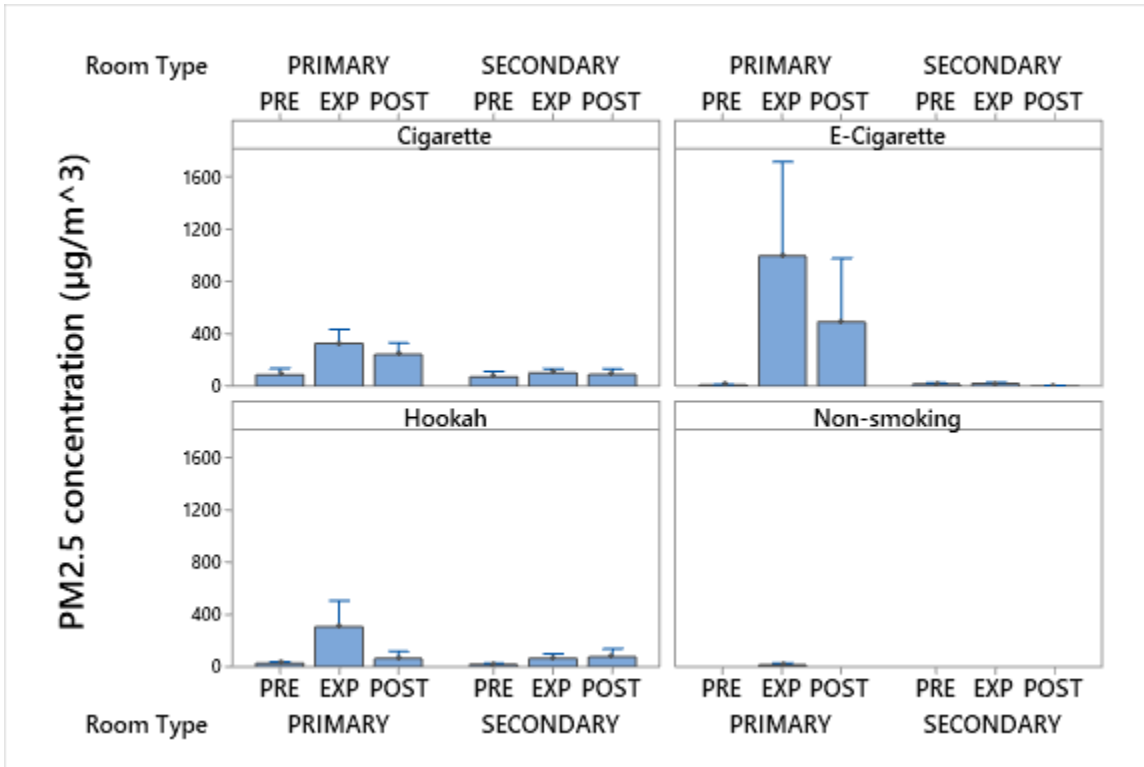

Supplemental Figure 2. Mean black carbon (BC) concentrations (columns) by product (cigarette, e-cigarette, hookah, non-smoking), room type (primary, secondary), and time period (pre-exposure, exposure, post-exposure). Blue bars above the columns represent one standard error from the mean. Primary rooms were defined as rooms where e-cigarettes, cigarettes, or hookahs were being used and secondary rooms were defined as rooms adjacent to where such products were being used. Non-smoking panels have only one bar, as air quality measurements were taken in only one room in the house and averaged for the entire time period, as there was no exposure period.

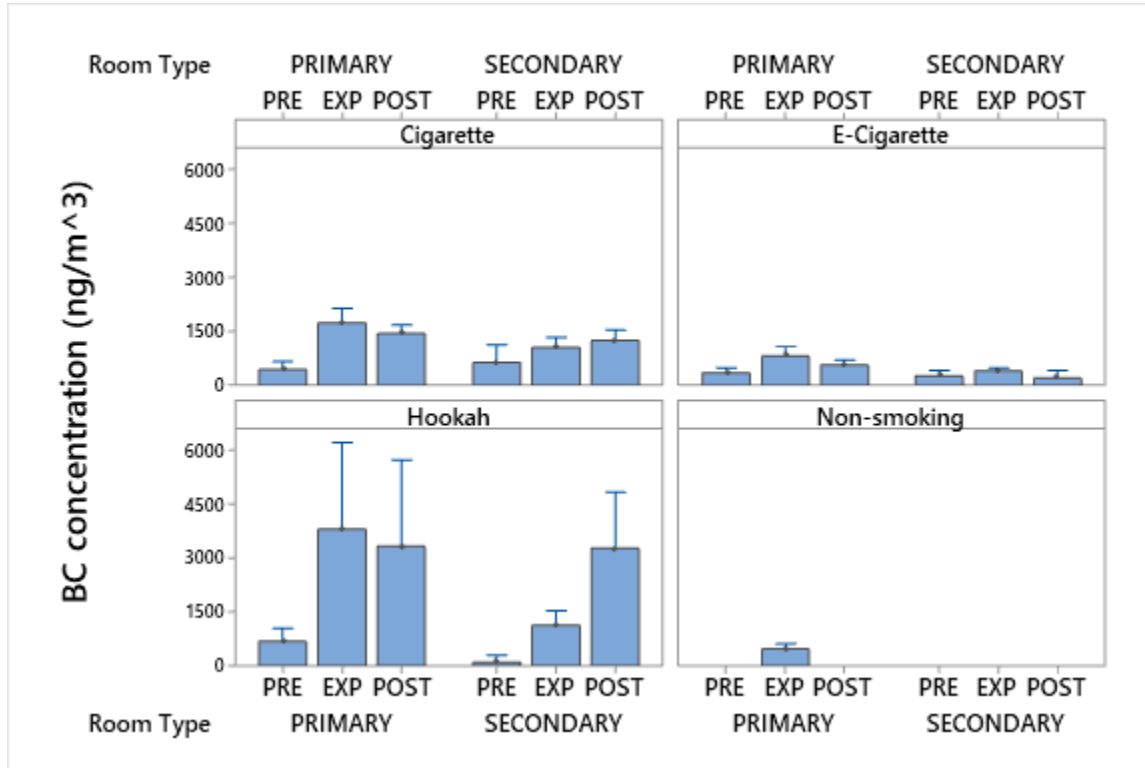

Supplemental Figure 3. Mean carbon monoxide (CO) concentrations (columns) by product (cigarette, e-cigarette, hookah, non-smoking), room type (primary, secondary), and time period (pre-exposure, exposure, post-exposure). Blue bars above the columns represent one standard error from the mean. Primary rooms were defined as rooms where e-cigarettes, cigarettes, or hookahs were being used and secondary rooms were defined as rooms adjacent to where such products were being used. Non-smoking panels have only one bar, as air quality measurements were taken in only one room in the house and averaged for the entire time period, as there was no exposure period.

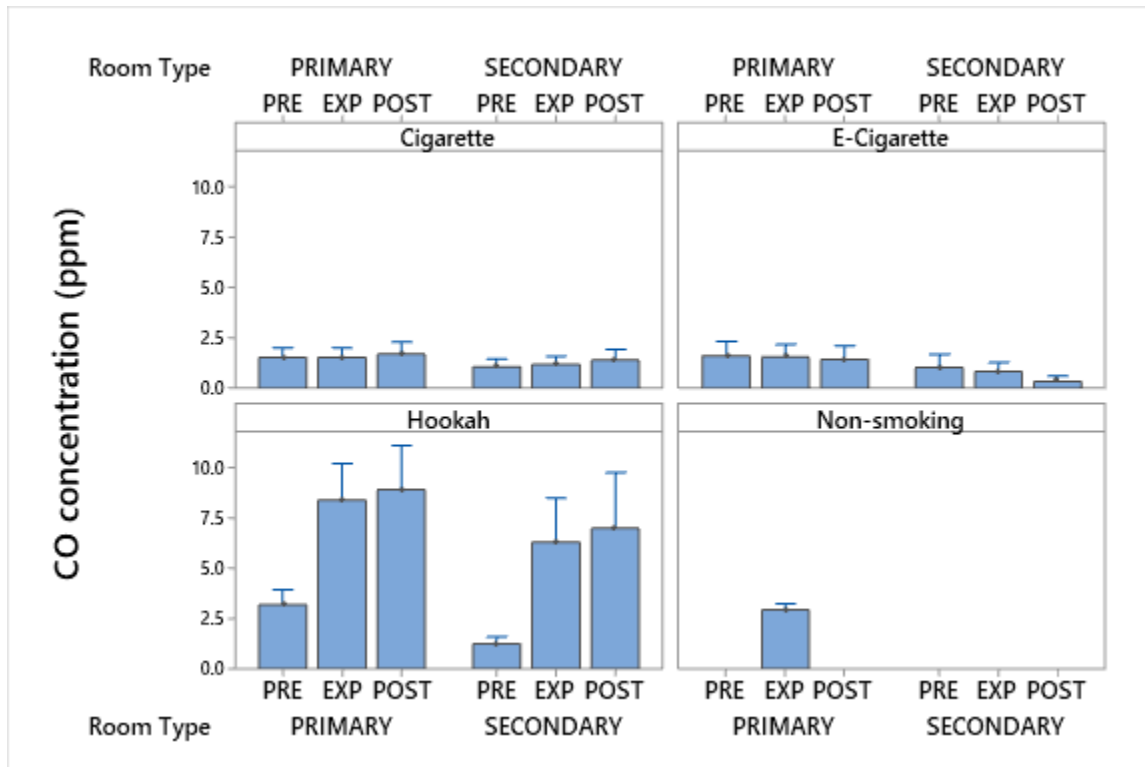

Supplement: NIHMS1955435-supplement-1.pdf [file NIHMS1955435-supplement-1.pdf]
